# Supplementary material
Source: Springer Nature journal article supplement (https://www.springermedizin.de/resource/supplementary/12891_2014_2230_MOESM1_ESM.pdf/9509738)
Supplement: MOESM1 [file 9509738]

**STROBE checklist for cross-sectional studies -**

**Upper body and lower limbs musculoskeletal symptoms and health inequalities in Europe. An analysis of cross-sectional data**

| <b>Item No</b>                  | <b>Recommendation</b>                                                                                                                                                                               | <b>Manuscript</b>                                                                                               |
|---------------------------------|-----------------------------------------------------------------------------------------------------------------------------------------------------------------------------------------------------|-----------------------------------------------------------------------------------------------------------------|
| <b>Title and abstract</b>       | 1 (a) Indicate the study's design with a commonly used term in the title or the abstract<br><br>(b) Provide in the abstract an informative and balanced summary of what was done and what was found | See title and abstract<br><br>See title and abstract                                                            |
| <b>Introduction</b>             |                                                                                                                                                                                                     |                                                                                                                 |
| <b>Background/rationale</b>     | 2 Explain the scientific background and rationale for the investigation being reported                                                                                                              | See Background section                                                                                          |
| <b>Objectives</b>               | 3 State specific objectives, including any prespecified hypotheses                                                                                                                                  | See Background section                                                                                          |
| <b>Methods</b>                  |                                                                                                                                                                                                     |                                                                                                                 |
| <b>Study design</b>             | 4 Present key elements of study design early in the paper                                                                                                                                           | See Methods section                                                                                             |
| <b>Setting</b>                  | 5 Describe the setting, locations, and relevant dates, including periods of recruitment, exposure, follow-up, and data collection                                                                   | Included. Data collection given by the EWCS methodology                                                         |
| <b>Participants</b>             | 6 (a) Give the eligibility criteria, and the sources and methods of selection of participants                                                                                                       | Included. See also flow diagramme                                                                               |
| <b>Variables</b>                | 7 Clearly define all outcomes, exposures, predictors, potential confounders, and effect modifiers. Give diagnostic criteria, if applicable                                                          | Included. Diagnostic criteria not applicable                                                                    |
| <b>Data sources/measurement</b> | 8* For each variable of interest, give sources of data and details of methods of assessment (measurement). Describe comparability of assessment methods if there is more than one group             | All variables were collected by EWCS survey methodology                                                         |
| <b>Bias</b>                     | 9 Describe any efforts to address potential sources of bias                                                                                                                                         | Crude and fully adjusted models were estimated. Several known confounders were included. See Background section |
| <b>Study size</b>               | 10 Explain how the study size was arrived at                                                                                                                                                        | See flow diagramme                                                                                              |
| <b>Quantitative variables</b>   | 11 Explain how quantitative variables were handled in the analyses. If applicable, describe which groupings were chosen and why                                                                     | See Table 1                                                                                                     |
| <b>Statistical methods</b>      | 12 (a) Describe all statistical methods, including those used to control for confounding                                                                                                            | See Methods section                                                                                             |

**STROBE checklist for cross-sectional studies -**

**Upper body and lower limbs musculoskeletal symptoms and health inequalities in Europe. An analysis of cross-sectional data**

| <b>Item No</b>          | <b>Recommendation</b>                                                                                                                                                                                           | <b>Manuscript</b>                                                                                                                                          |
|-------------------------|-----------------------------------------------------------------------------------------------------------------------------------------------------------------------------------------------------------------|------------------------------------------------------------------------------------------------------------------------------------------------------------|
|                         | (b) Describe any methods used to examine subgroups and interactions                                                                                                                                             | See Methods section                                                                                                                                        |
|                         | (c) Explain how missing data were addressed                                                                                                                                                                     | Only complete case observations were included. The number of missing data for the dependent variable is very low in comparison to sample size, see Table 2 |
|                         | (d) If applicable, describe analytical methods taking account of sampling strategy                                                                                                                              | A nested random-effects structure by sampling units and countries was defined. See Methods section                                                         |
|                         | (e) Describe any sensitivity analyses                                                                                                                                                                           | Crude and fully adjusted models were compared                                                                                                              |
| <b>Results</b>          |                                                                                                                                                                                                                 |                                                                                                                                                            |
| <b>Participants</b>     | 13* (a) Report numbers of individuals at each stage of study—eg numbers potentially eligible, examined for eligibility, confirmed eligible, included in the study, completing follow-up, and analysed           | See flow diagramme, EWCS description and EWCS documentation referenced in the manuscript                                                                   |
|                         | (b) Give reasons for non-participation at each stage                                                                                                                                                            | Not available                                                                                                                                              |
|                         | (c) Consider use of a flow diagram                                                                                                                                                                              | Included                                                                                                                                                   |
| <b>Descriptive data</b> | 14* (a) Give characteristics of study participants (eg demographic, clinical, social) and information on exposures and potential confounders                                                                    | Included in Table 2                                                                                                                                        |
| <b>Outcome data</b>     | (b) Indicate number of participants with missing data for each variable of interest                                                                                                                             | Included in Table 2                                                                                                                                        |
| <b>Main results</b>     | 15* Report numbers of outcome events or summary measures                                                                                                                                                        | Included in Table 2                                                                                                                                        |
|                         | 16 (a) Give unadjusted estimates and, if applicable, confounder-adjusted estimates and their precision (eg, 95% confidence interval). Make clear which confounders were adjusted for and why they were included | Included in Table 3 (crude estimates)                                                                                                                      |
|                         | (b) Report category boundaries when continuous variables were categorized                                                                                                                                       | Not applicable                                                                                                                                             |
| <b>Other analyses</b>   | (c) If relevant, consider translating estimates of relative risk into absolute risk for a meaningful time period                                                                                                | Not applicable                                                                                                                                             |
| <b>Key results</b>      | 17 Report other analyses done—eg analyses of subgroups and interactions, and sensitivity analyses                                                                                                               | See Figure 3                                                                                                                                               |
| <b>Limitations</b>      |                                                                                                                                                                                                                 |                                                                                                                                                            |
|                         | 18 Summarise key results with reference to study objectives                                                                                                                                                     | See Discussion section                                                                                                                                     |
| <b>Interpretation</b>   | 19 Discuss limitations of the study, taking into account sources of potential bias or                                                                                                                           | See Limitations in the Discussion section                                                                                                                  |

---

**STROBE checklist for cross-sectional studies -**

**Upper body and lower limbs musculoskeletal symptoms and health inequalities in Europe. An analysis of cross-sectional data**

---

|                          | <b>Item No</b> | <b>Recommendation</b>                                                                                                                                                                                                                                 | <b>Manuscript</b>                                                 |
|--------------------------|----------------|-------------------------------------------------------------------------------------------------------------------------------------------------------------------------------------------------------------------------------------------------------|-------------------------------------------------------------------|
| <b>Generalisability</b>  | 20             | imprecision. Discuss both direction and magnitude of any potential bias<br>Give a cautious overall interpretation of results considering objectives, limitations, multiplicity of analyses, results from similar studies, and other relevant evidence | See Discussion and Conclusion sections                            |
| <b>Other information</b> |                |                                                                                                                                                                                                                                                       |                                                                   |
| <b>Funding</b>           | 21             | Discuss the generalisability (external validity) of the study results                                                                                                                                                                                 | See Discussion and Conclusion sections                            |
|                          | 22             | Give the source of funding and the role of the funders for the present study and, if applicable, for the original study on which the present article is based                                                                                         | Included in the Competing interests and Acknowledgements sections |

---
